# Supplementary material for: The intestinal microbiota contributes to the growth and physiological state of muscle tissue in piglets
Source: PubMed Central journal article supplement (PMC8160342; doi:10.1038/s41598-021-90881-5), 2021-05-27
Supplement: 41598_2021_90881_MOESM1_ESM.pdf [file 41598_2021_90881_MOESM1_ESM.pdf]

# **The intestinal microbiota contributes to the growth and physiological state of muscle tissue in piglets**

Renli Qi<sup>1,2,3,#,\*</sup>, Jing Sun<sup>1,#</sup>, Xiaoyu Qiu<sup>2</sup>, Yong Zhang<sup>4</sup>, Jing Wang<sup>1</sup>, Qi wang<sup>1</sup>, Jinxiu Huang<sup>1,2</sup>, Liangpeng Ge<sup>1,2,3,\*</sup> & Zuohua Liu<sup>1,2,\*</sup>

<sup>1</sup> Chongqing Academy of Animal Science, Rongchang, Chongqing, 40240, China

<sup>2</sup> Key Laboratory of Pig Industry Sciences, Ministry of Agriculture, Rongchang, Chongqing, 402460, China

<sup>3</sup> Chongqing Key Laboratory of Pig Industry Sciences, Rongchang, Chongqing, 402460, China

<sup>4</sup> Southwest University of Science and Technology, MianYang, Sichuan, 621010, China

\* Corresponding Author, [qirenli1982@163.com](mailto:qirenli1982@163.com) (R.Q);  
[geliangpeng1982@163.com](mailto:geliangpeng1982@163.com) (L.G.); [liuzuohua66@163.com](mailto:liuzuohua66@163.com)  
(L.Z.)

## Supplementary table 1. Sequences of qPCR primers

| Gene   | Sequence 5' → 3'                                         |
|--------|----------------------------------------------------------|
| GPCR40 | R: GCCGTGCTCTGTCCCATCTTG<br>F: AACTCAGGGCAGCCAGGAAG      |
| GPCR41 | R: CGCTGCTCAACTTCCTCGTCTG<br>F: GTCTCCACTCGGGGCTTTTGC    |
| GPCR43 | R: GCTGCTGCTGCTGCCCTTG<br>F: TGCTGATGCCCGCCAGGAG         |
| Glut4  | R: CAACCAGCCTATGCCACCATCG<br>F: GCCCGTTCCACCAGCAACAC     |
| CAT1   | R: CATCAAAAAGTGGCAGCTCA<br>F: TGGTAGCGATGCAGTCAAAG       |
| CD36   | R: TCGTGCCTATCCTCTGGCTT<br>F: TTCTACCAGGCCAAGGAGGT       |
| COX1   | R: ATTATCCTGACGCATACACAGCA<br>F: GCAGATACTTCTCGTTTTGATGC |
| TFAM   | R: GCTTATAGGGCAGACTGGCAG<br>F: GACCATCCTTAGCTTCCTGAAA    |
| MyHC1  | R: AAGGGCTTGAACGAGGAGTAGA<br>F: TTATTCTGCTTCCTCCAAAGGG   |
| MyHC2A | R: GCTGAGCGAGCTGAAATCC<br>F: ACTGAGACACCAGAGCTTCT        |
| MyHC2B | R: ATGAAGAGGAACACATTA<br>F: TTATTGCCTCAGTAGCTTG          |
| MyHC2X | R: AGAAGATCAACTGAGTGAAC<br>F: AGAGCTGAGAACTAACGTG        |
| GAPDH  | R: GAAGGTCGGAGTGAACGGAT<br>F: CATGGGTAGAATCATACTGGAACA   |

# Supplementary Figure 1: The full-length blots of Figure 3.

## A. INSR

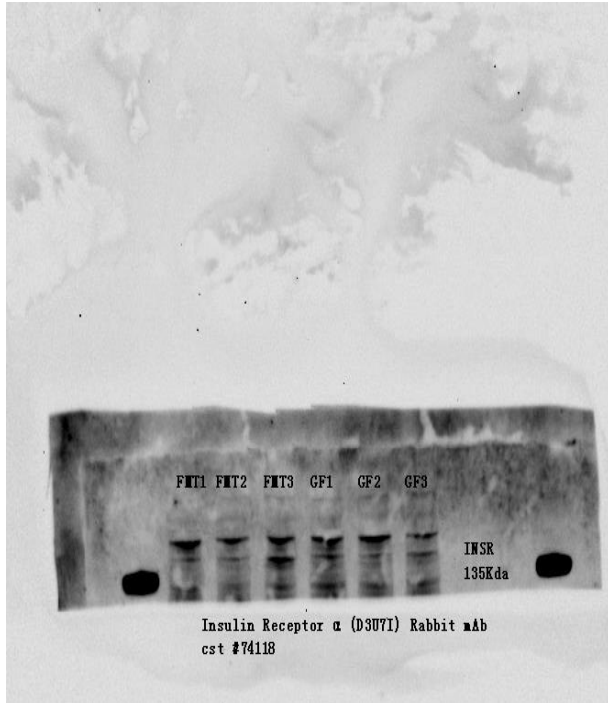

(GF Pigs and FMT pigs)

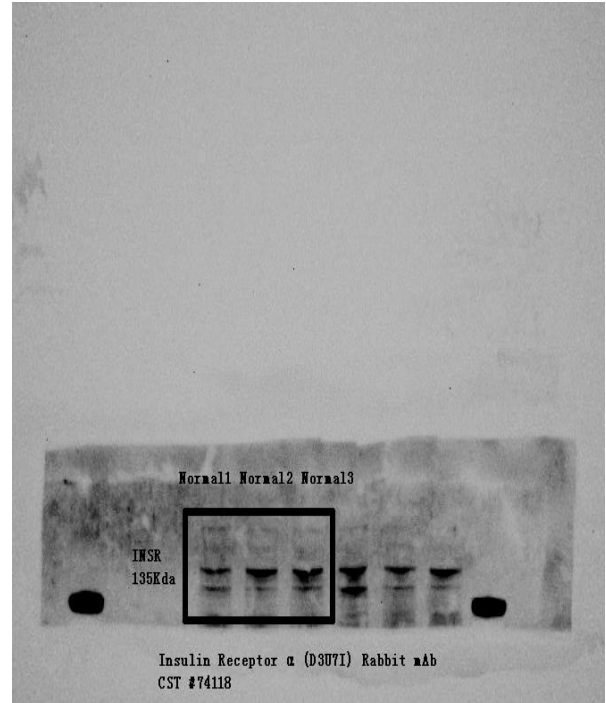

(Normal pigs)

## B. MyoD

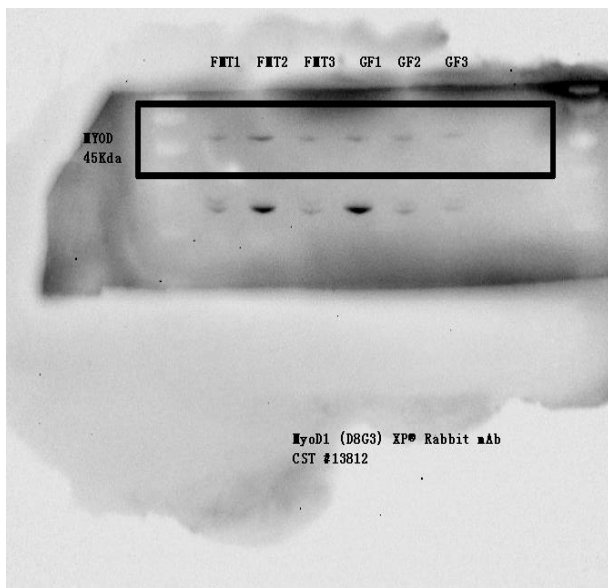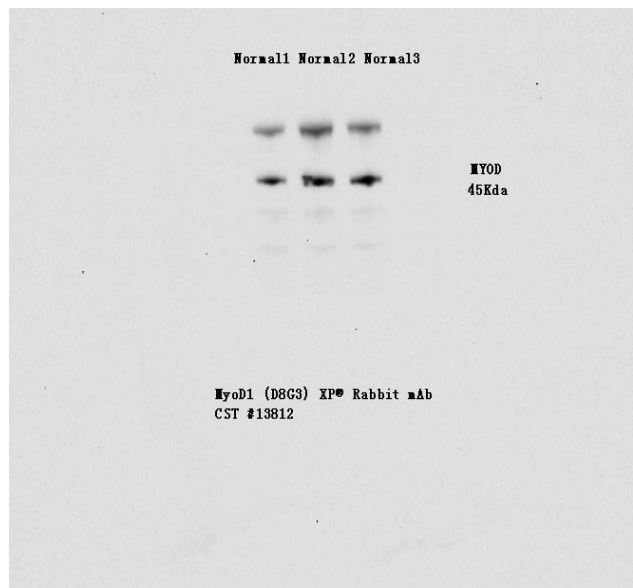

### C. MYF5

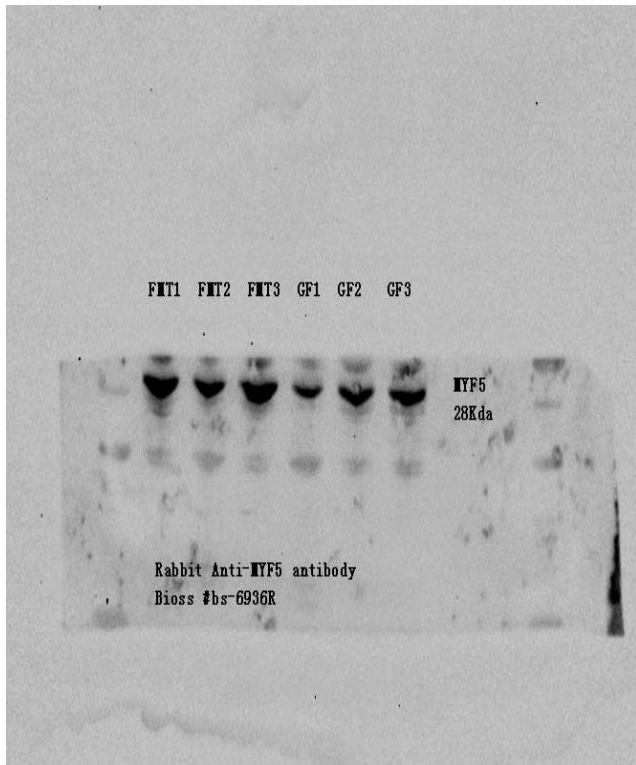

(GF Pigs and FMT pigs)

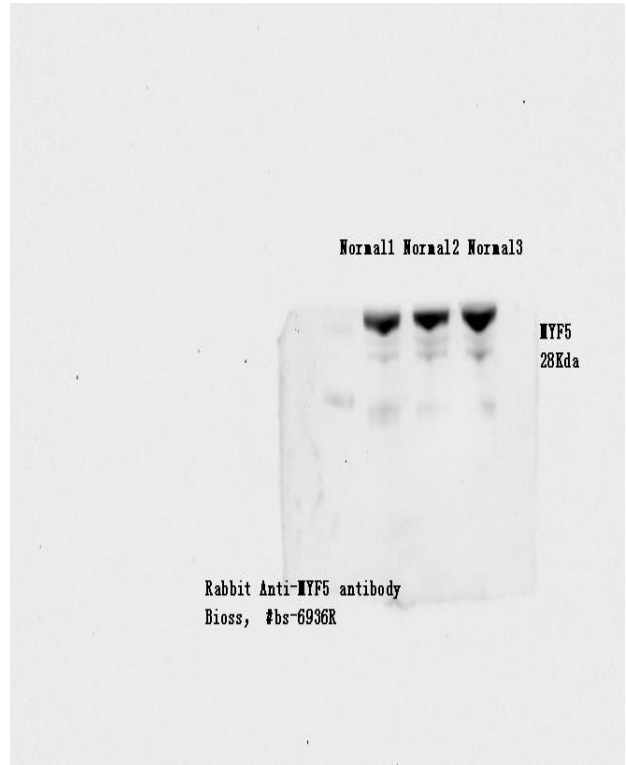

(Normal pigs)

### D. Myogenin

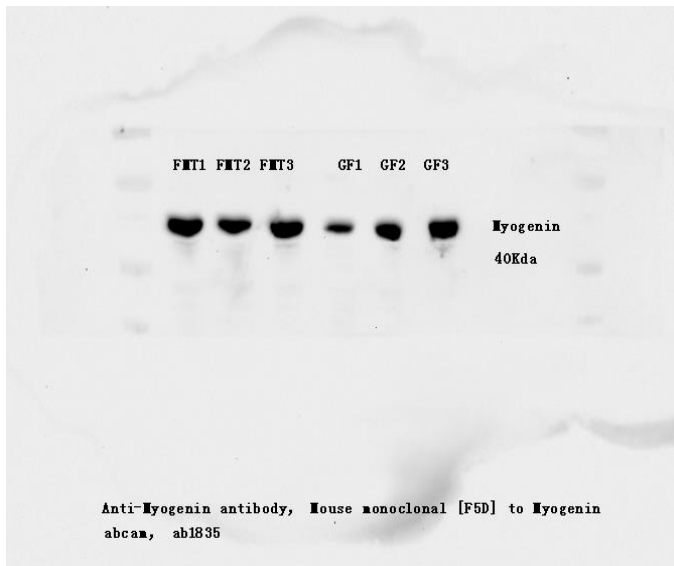

(GF Pigs and FMT pigs)

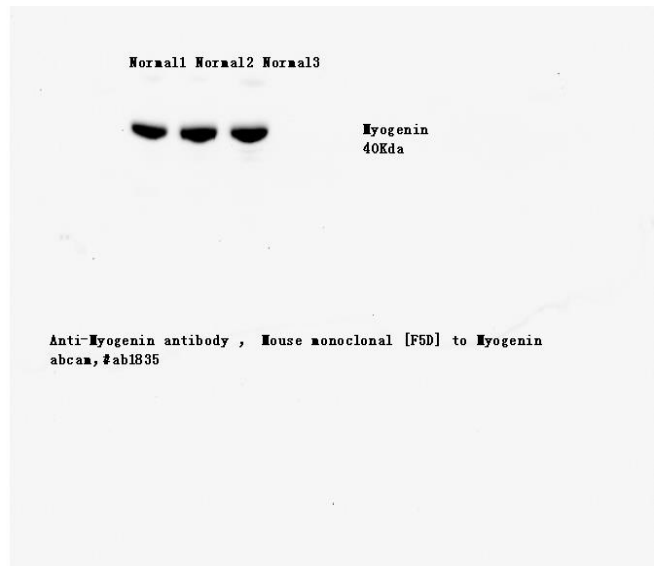

(Normal pigs)

## E. GAPDH

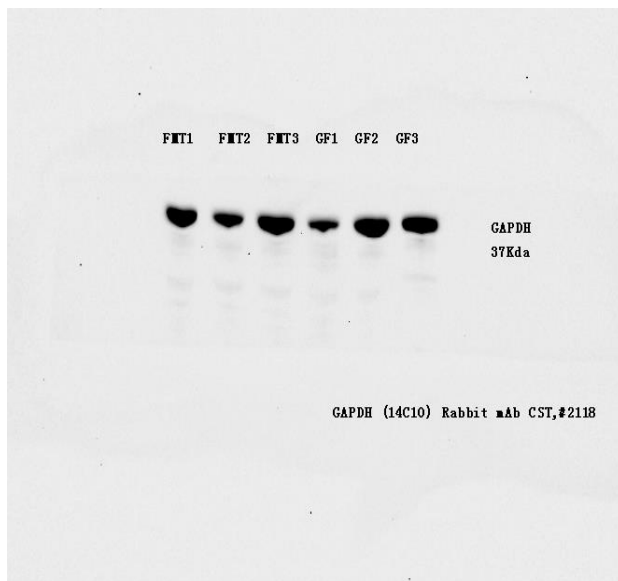

(GF Pigs and FMT pigs)

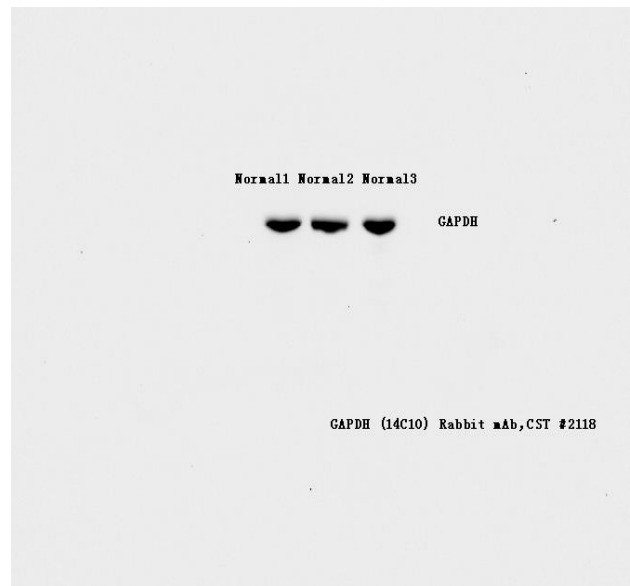

(Normal pigs)

## Supplementary Figure 2: The full-length blots of Figure 6.

### IGF1R

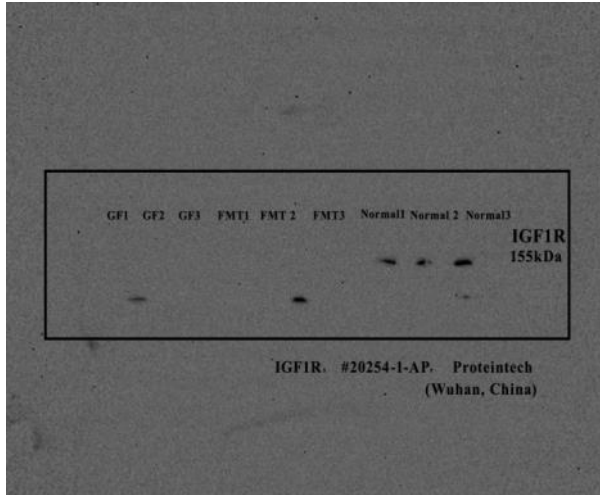

### P-AKT

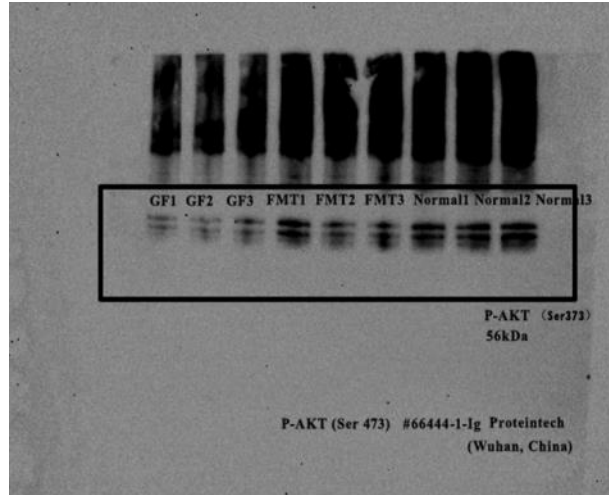

### AKT

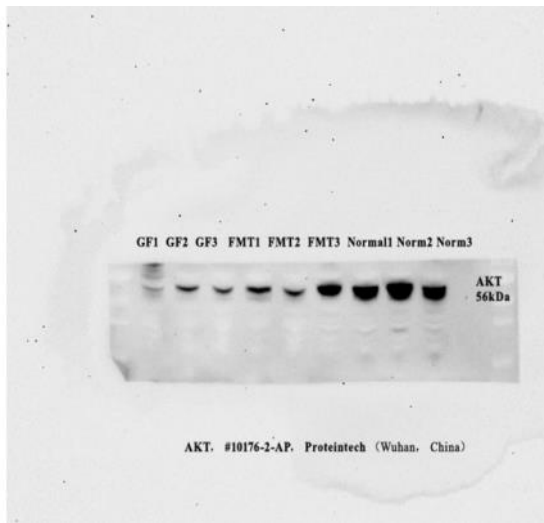

### P-mTOR

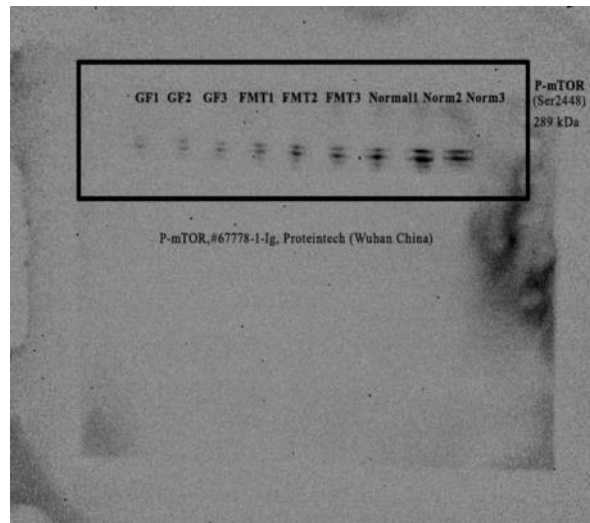

# mTOR

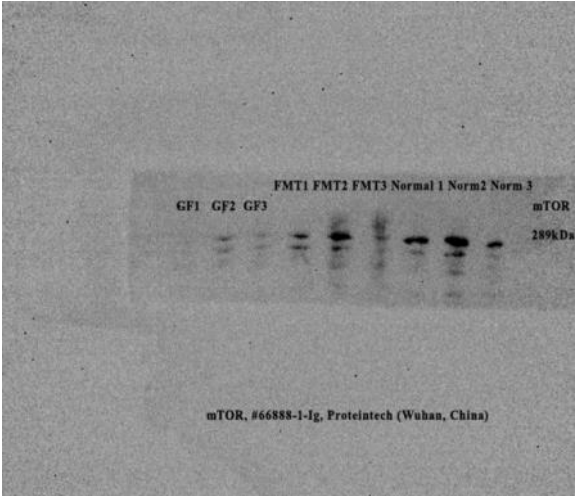

# GAPDH

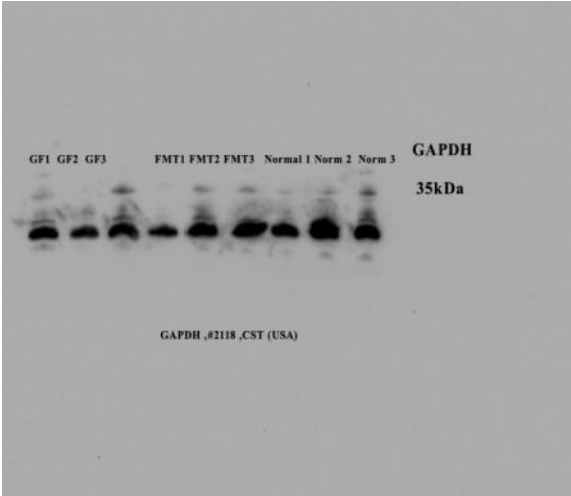

## Supplementary Figure 3: The full-length blots of Figure 7.

### A. PGC-1a

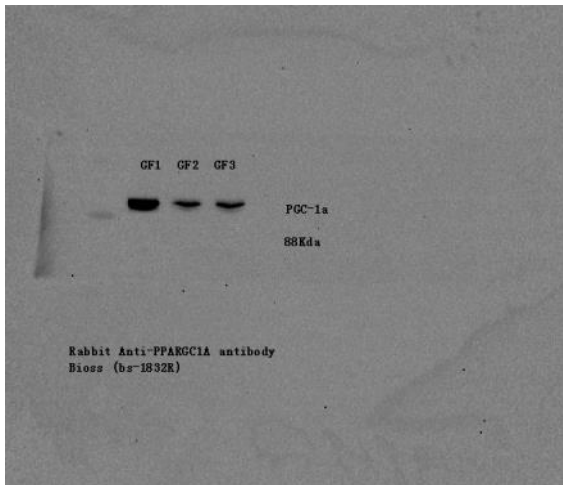

(GF Pigs)

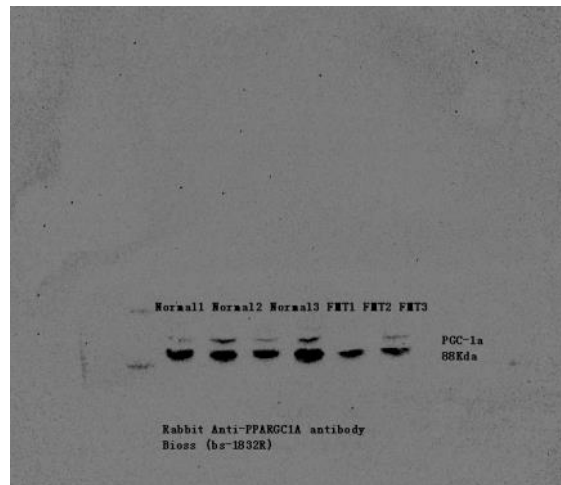

(Normal pigs and FMT pigs)

### B. GAPDH

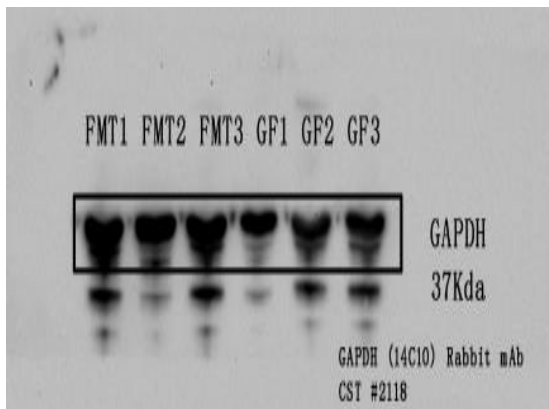

(GF Pigs and FMT pigs)

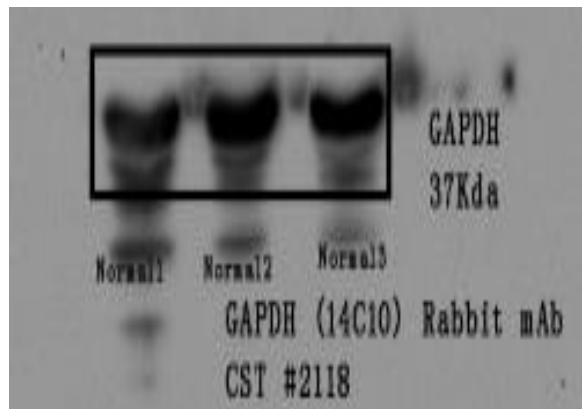

(Normal pigs)
